# Supplementary material for: Spatial patterning of self-harm rates within urban areas
Source: PubMed Central journal article supplement (PMC6336929; doi:10.1007/s00127-018-1601-3), 2018-09-26
Supplement: 127_2018_1601_MOESM1_ESM.pdf [file 127_2018_1601_MOESM1_ESM.pdf]

**Figure S1. Distribution of deprivation, population density, green space and non-white ethnic minority populations across the study area by lower super output area.**

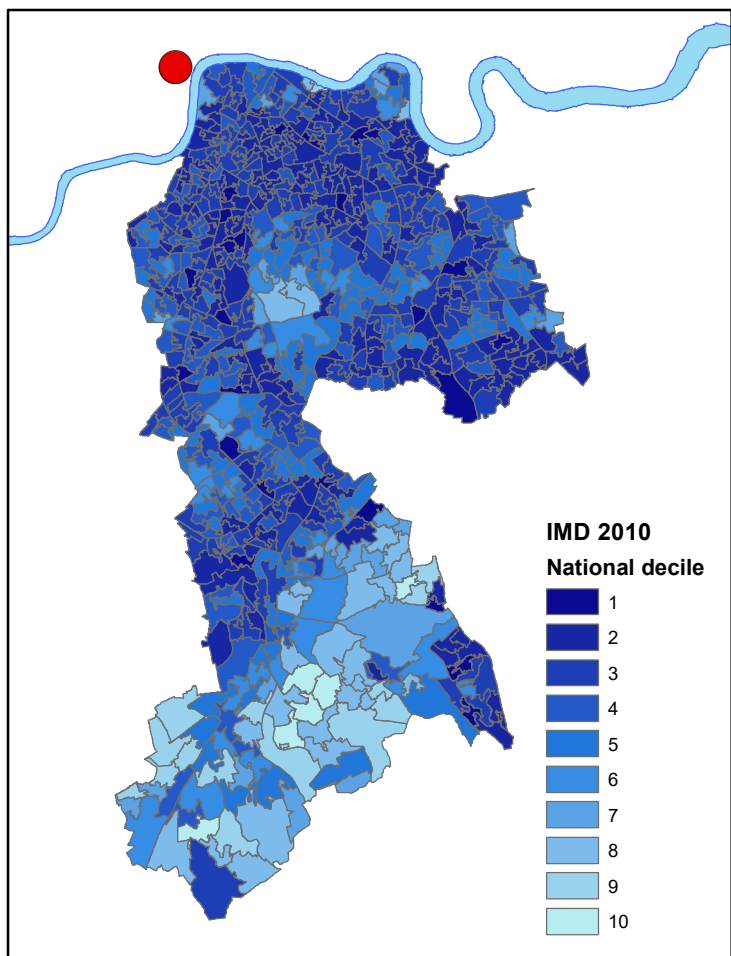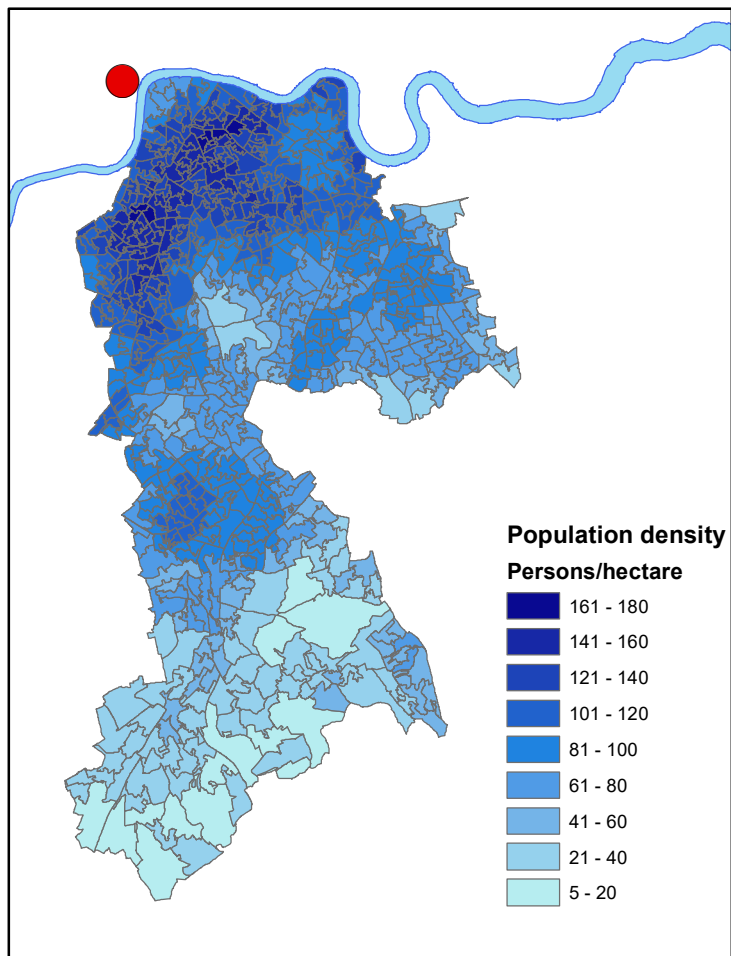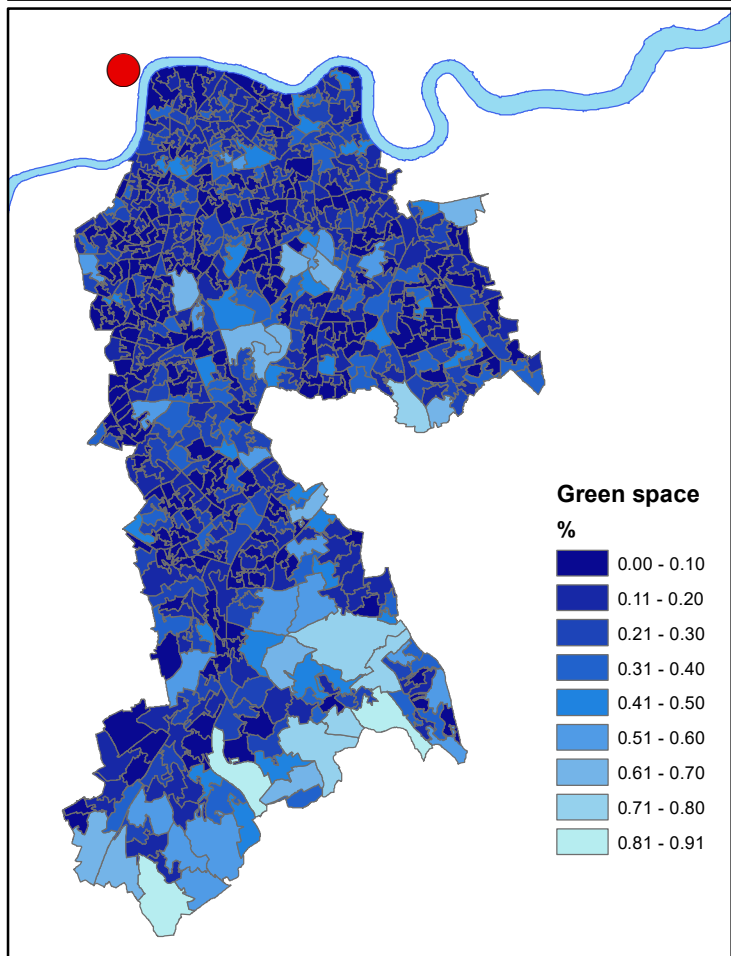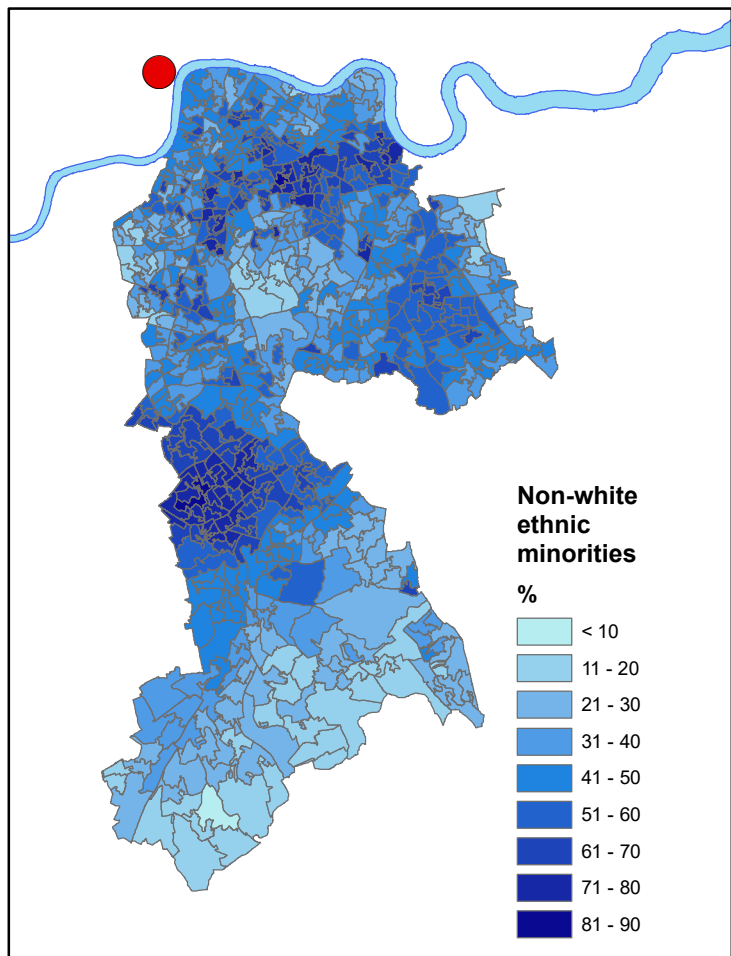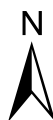

● City Centre  
 River Thames

Boundaries: Office of National Statistics (2001) Census: boundary data (England and Wales) [English Lower Layer Super Output Areas, 2001] UK Data Service. Digitised Boundary data. [borders.ukdataservice.ac.uk](http://borders.ukdataservice.ac.uk). Contains National Statistics data (c) Crown copyright and database right (2018). Contains OS data (c) Crown copyright and database right (2018)  
 Data: Indices of Multiple Deprivation, 2010. Department of Communities and Local Government  
 Other data, Census 2011, Office of National Statistics
