# Supplementary material for: Spatial patterning of self-harm rates within urban areas
Source: PubMed Central journal article supplement (PMC6336929; doi:10.1007/s00127-018-1601-3), 2018-09-26
Supplement: 127_2018_1601_MOESM2_ESM.pdf [file 127_2018_1601_MOESM2_ESM.pdf]

**Figure S2. Residual age and sex standardised admission ratios for self-harm by lower super output area after a) spatial smoothing and b) adjustment for deprivation, during three time periods\***

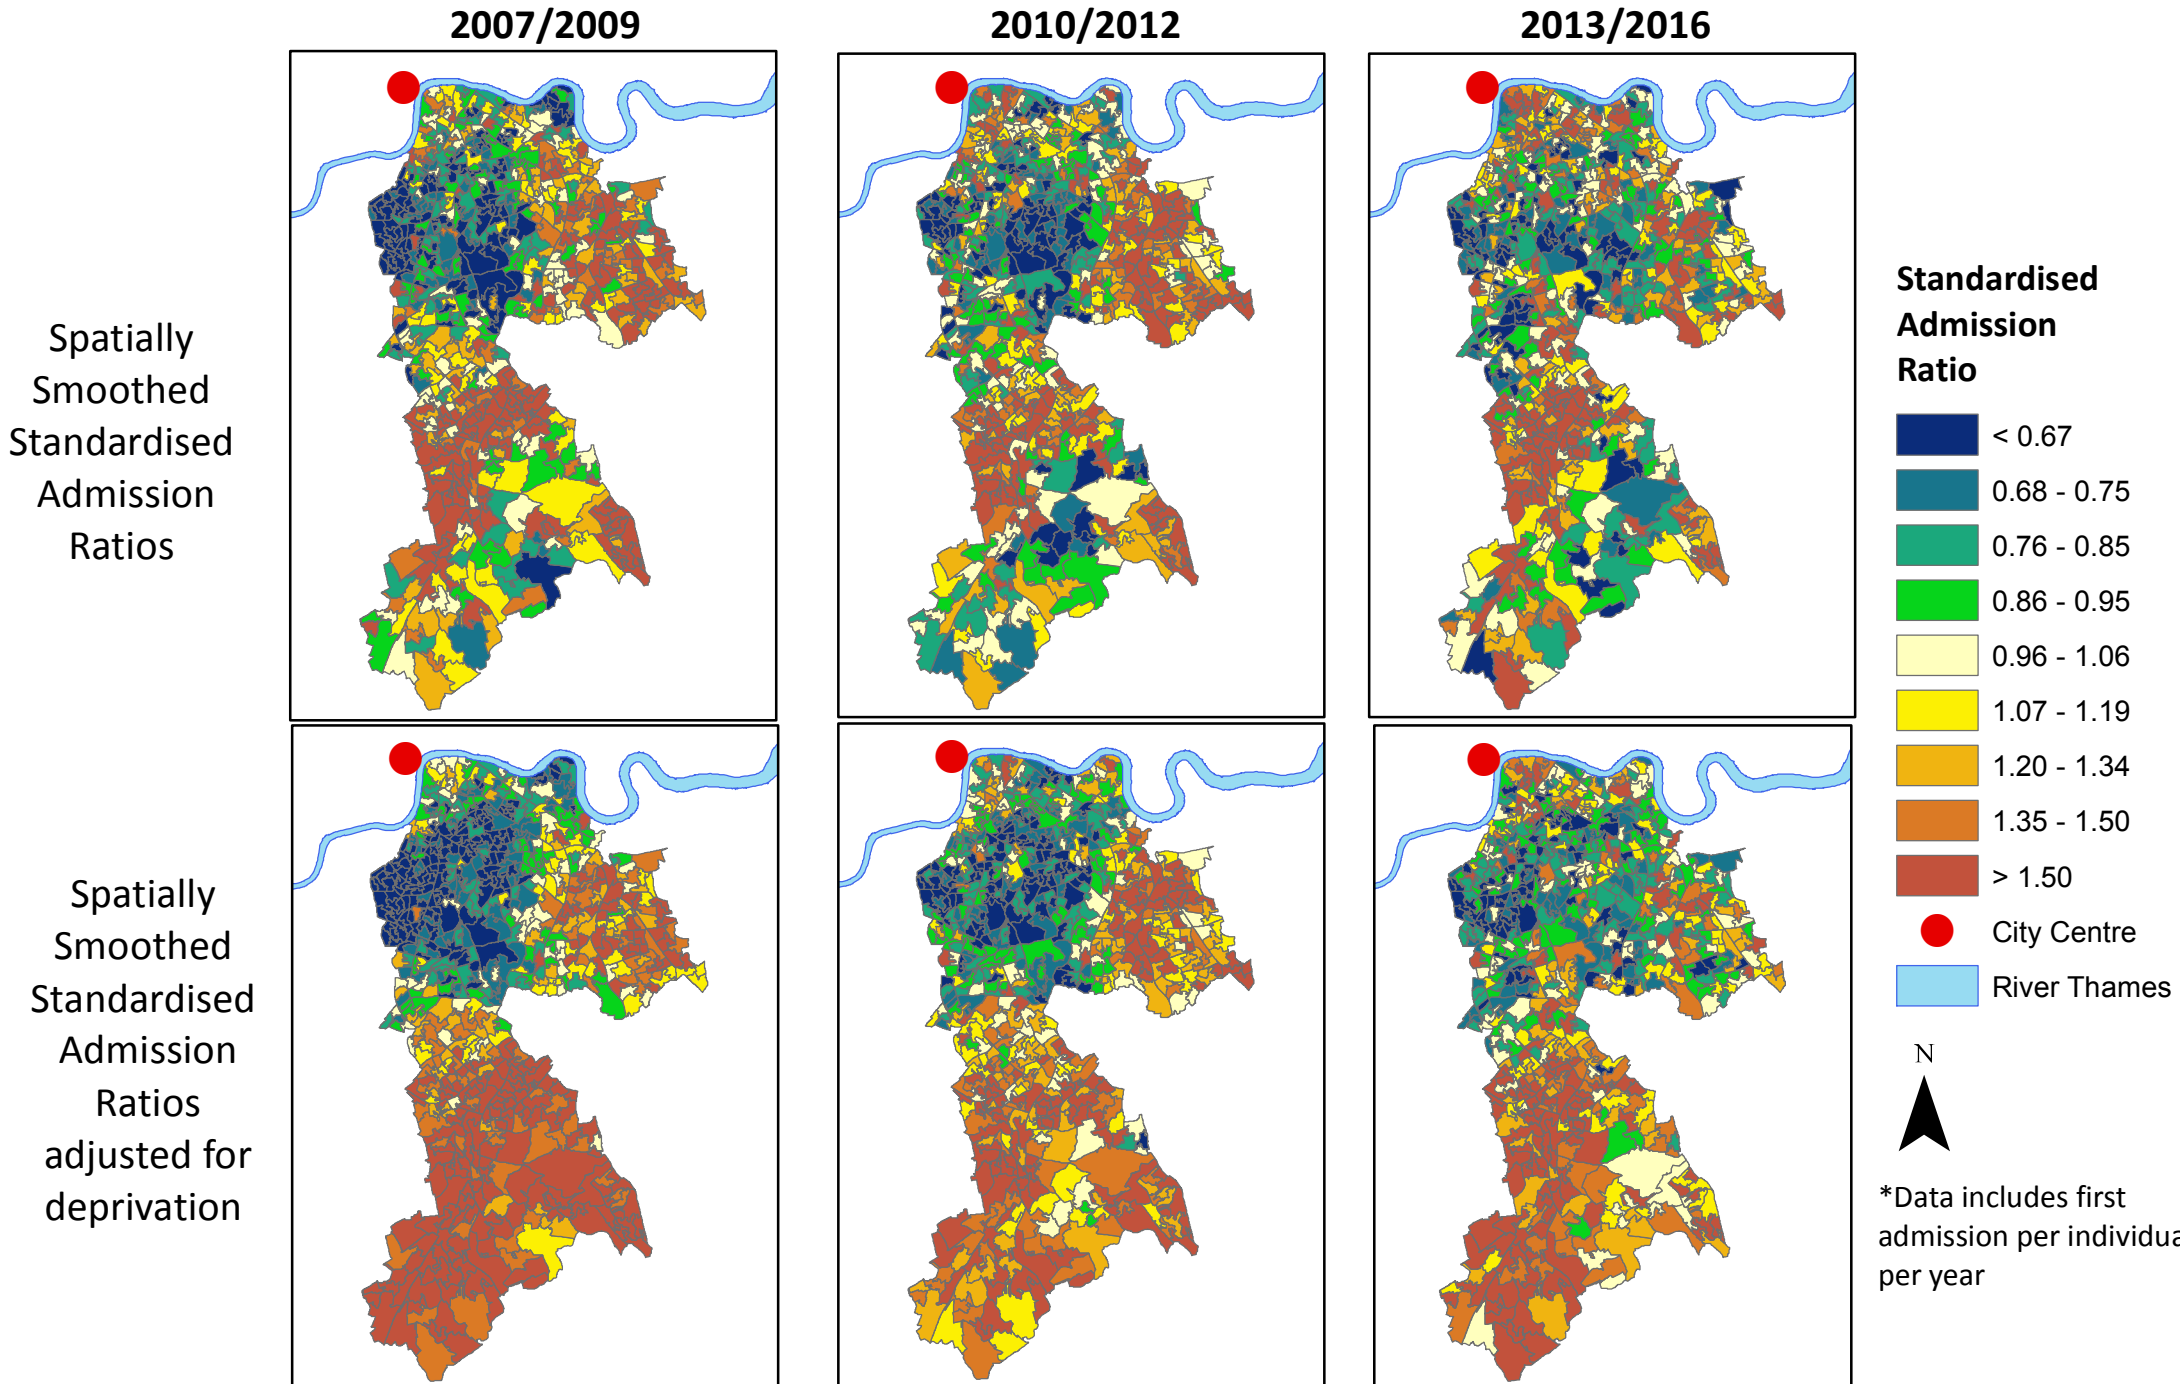

Boundaries: Office of National Statistics (2001) Census: boundary data (England and Wales) [English Lower Layer Super Output Areas, 2001] UK Data Service. Digitised Boundary data. borders.ukdataservice.ac.uk. Contains National Statistics data (c) Crown copyright and database right (2018). Contains OS data (c) Crown copyright and database right (2018)
